# Supplementary material for: Palatability and Swallowability of Pimavanserin When Mixed with Selected Food Vehicles: An Exploratory Open-Label Crossover Study
Source: Geriatrics (Basel). 2021 Jun 15;6(2):61. doi: 10.3390/geriatrics6020061 (PMC8293179; doi:10.3390/geriatrics6020061)
Supplement: Supplementary file 1 [file geriatrics-06-00061-s001.zip › geriatrics-1200719-supplementary.pdf]

## Supplementary Material

**Table S1.** Five-point scales used for primary and secondary endpoint assessments

| Primary Endpoints |                          |                            |                          |                          | Secondary Endpoints |                          |                                               |
|-------------------|--------------------------|----------------------------|--------------------------|--------------------------|---------------------|--------------------------|-----------------------------------------------|
| Rating            | Taste (palatability)     | Swallowability             | Mouthfeel (texture)      | Smell                    | Bitterness          | Aftertaste               | Capsule manipulation (participant assessment) |
| 1                 | Like extremely           | Very easy                  | Like extremely           | Like extremely           | No bitterness       | Like extremely           | Very easy                                     |
| 2                 | Like moderately          | Somewhat easy              | Like moderately          | Like moderately          | Mild bitterness     | Like moderately          | Somewhat easy                                 |
| 3                 | Neither like nor dislike | Neither easy nor difficult | Neither like nor dislike | Neither like nor dislike | Moderate bitterness | Neither like nor dislike | Neither easy nor difficult                    |
| 4                 | Dislike moderately       | Somewhat difficult         | Dislike moderately       | Dislike moderately       | Severe bitterness   | Dislike moderately       | Somewhat difficult                            |
| 5                 | Dislike extremely        | Very difficult             | Dislike extremely        | Dislike extremely        | Extreme bitterness  | Dislike extremely        | Very difficult                                |

**Table S2.** Palatability and swallowability assessments of pimavanserin/food vehicle mixtures from Part 1a (minimum food volume testing)

| Assessment    | Palatability              |                        |                           |                           | Swallowability   |                      |                      |                      |
|---------------|---------------------------|------------------------|---------------------------|---------------------------|------------------|----------------------|----------------------|----------------------|
|               | Applesauce                | Chocolate Pudding      | Yogurt                    | Vanilla Ensure®           | Applesauce       | Chocolate Pudding    | Yogurt               | Vanilla Ensure®      |
| Participant 1 | 4<br>(dislike moderately) | 1<br>(like extremely)  | 2<br>(like moderately)    | 4<br>(dislike moderately) | 1<br>(very easy) | 1<br>(very easy)     | 1<br>(very easy)     | 1<br>(very easy)     |
| Participant 2 | 2<br>(like moderately)    | 2<br>(like moderately) | 4<br>(dislike moderately) | 2<br>(like moderately)    | 1<br>(very easy) | 2<br>(somewhat easy) | 2<br>(somewhat easy) | 2<br>(somewhat easy) |

For Part 1a assessments, pimavanserin was mixed with 15 mL (1 tablespoon) of food vehicle.

Palatability rating scores were 1 (like extremely), 2 (like moderately), 3 (neither like nor dislike), 4 (dislike moderately), 5 (dislike extremely).

Swallowability rating scores were 1 (very easy), 2 (somewhat easy), 3 (neither easy nor difficult), 4 (somewhat difficult), 5 (very difficult).

**Figure S1.** Percentage of participants with favorable response for aftertaste of pimavanserin/food vehicle mixtures over time

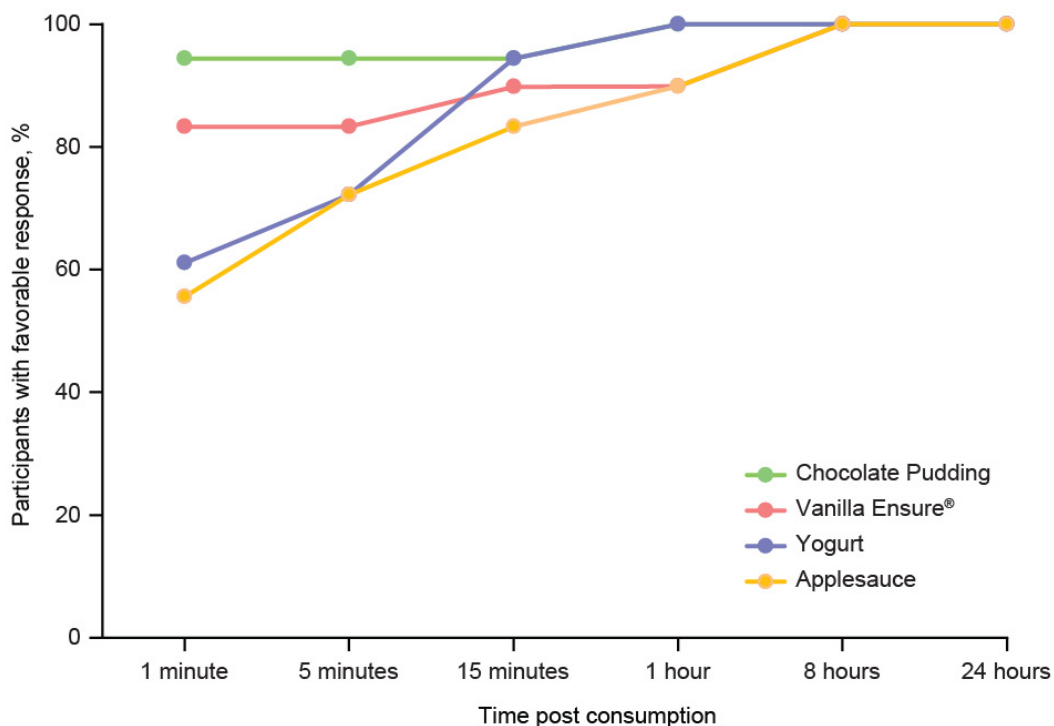

A favorable response for aftertaste was defined as a score of 1–3 (like extremely, like moderately, neither like nor dislike).
